# Supplementary material
Source: Research Square preprint supplement (doi:10.21203/rs.3.rs-9484962/v1)
Supplement: Supplementary file 1 [file a4beb46b9e2d4a9b6e72c02f.docx]

**Supplementary Material - Figures**


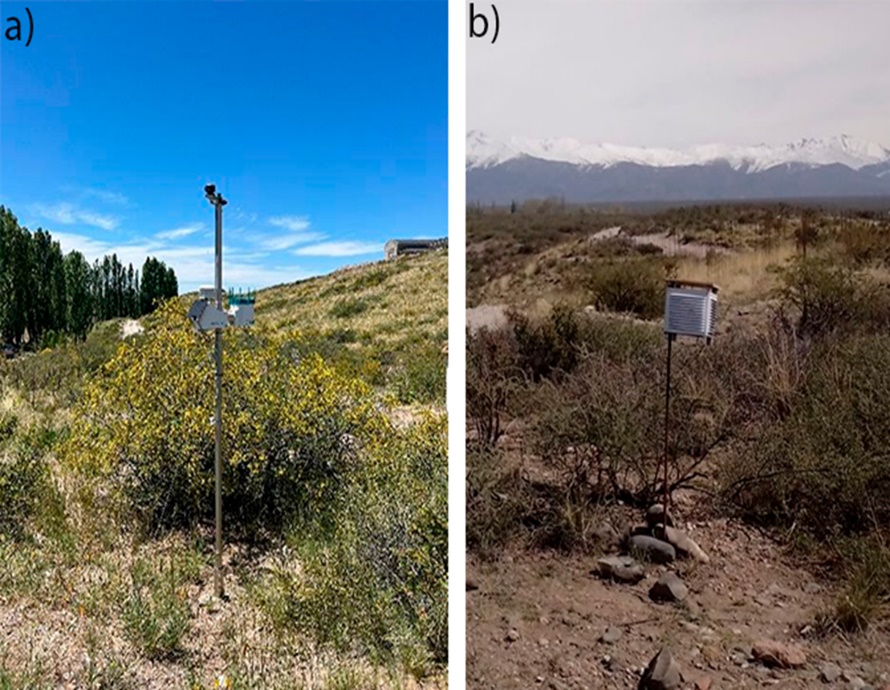


Figure S1. Instrumentation used in the study: a) μMETOS meteorological station 12A; b) HOBO Pendant MX2201 temperature sensor.


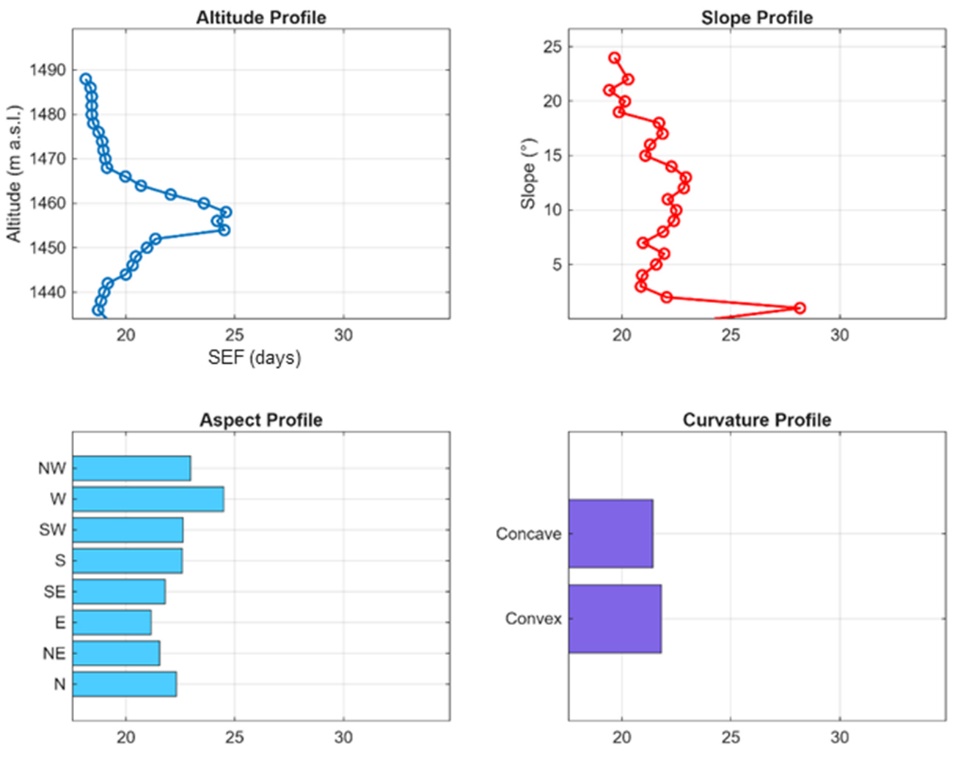


Figure S2. Topographic profile of clusters 2 based on conditional SEF distributions: a) altitude, b) slope (°), c) aspect (cardinal orientation), and d) curvature types).


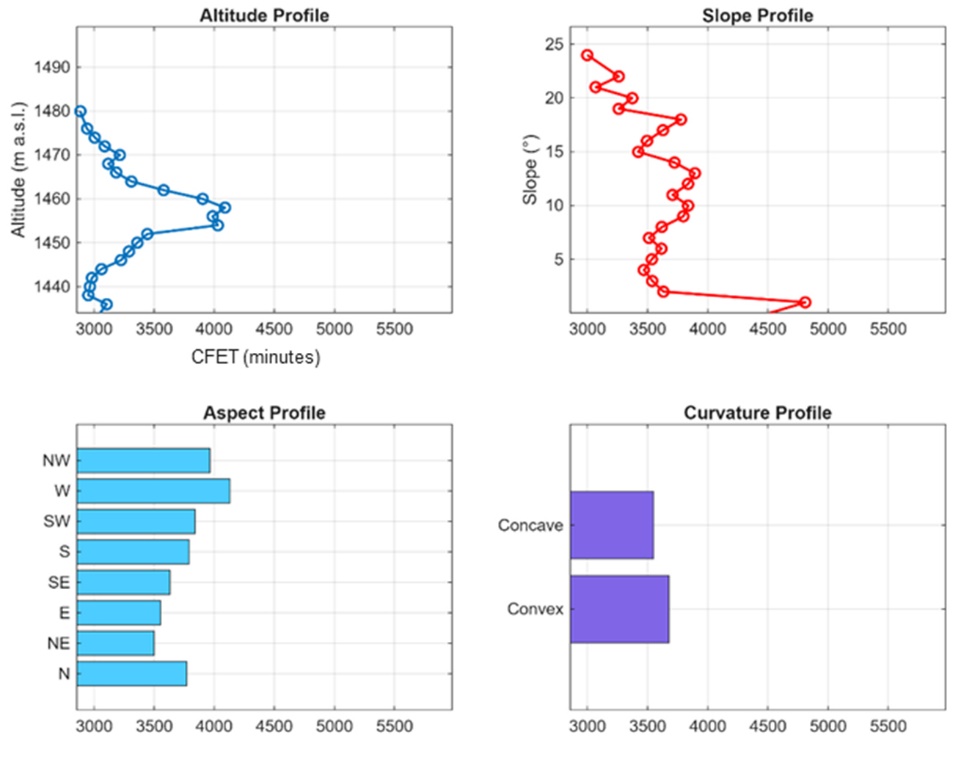


Figure S3. Topographic profile of clusters 2 based on conditional CFET distributions: a) altitude, b) slope (°), c) aspect (cardinal orientation), and d) curvature types).


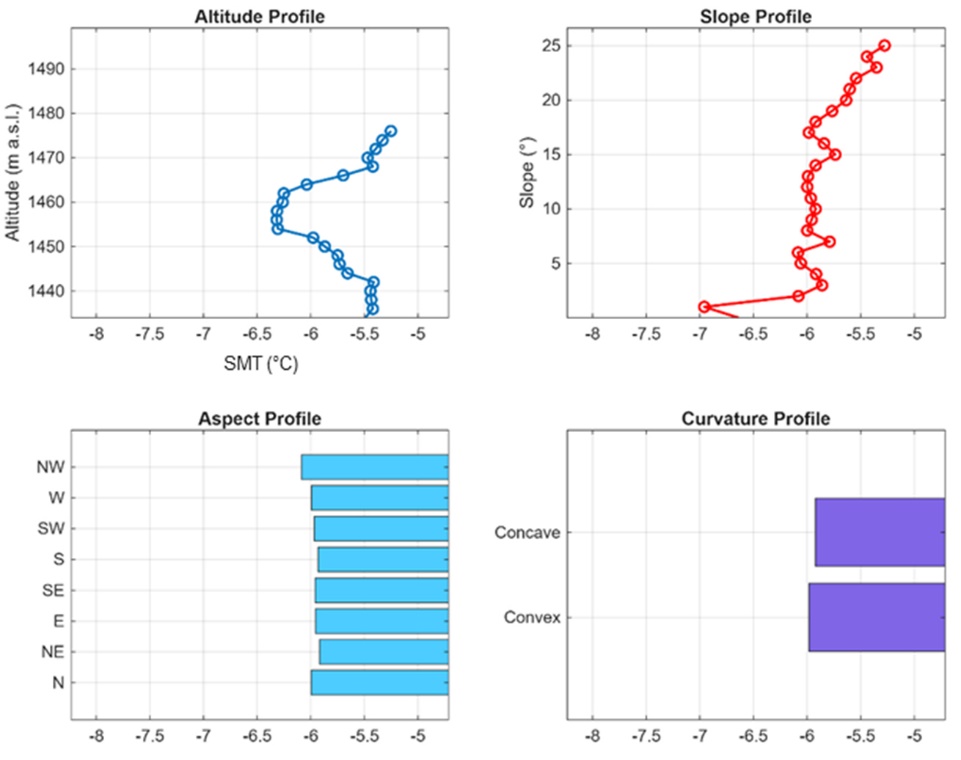


Figure S4. Topographic profile of clusters 3 based on conditional SMT distributions: a) altitude, b) slope (°), c) aspect (cardinal orientation), and d) curvature types).
